# Supplementary material
Source: PubMed Central journal article supplement (PMC3204913)
Supplement: supp_blood-2011-05-355370_Document1.pdf [file supp_blood-2011-05-355370_Document1.pdf]

## **Bioinformatics identification of C6orf105 as a putative protein that co-regulates with TFPI**

*C6orf105* was identified as potentially co-expressing with *TFPI* by a novel bioinformatics approach that entails a global meta-analysis (GAMMA) of microarray data<sup>1</sup>, which was also validated in a recent publication<sup>2</sup>. A total of 3,551 human 2-color microarray datasets were downloaded for analysis from the GEO repository.

GAMMA first identified genes co-expressed with *TFPI* and ranked them by how consistently and frequently they were co-expressed in the same direction as *TFPI* (i.e., up-regulated and down-regulated together), weighing the relevance of each gene-gene association with a combination of mutual information (i.e., to account for the differences in the relative frequency by which genes are differentially expressed), the total number of times each gene pair was co-expressed and the “purity” of the pattern by which they were co-expressed (i.e., if a gene pair always change their expression in the same direction, then the “purity” of their pattern is 100%). Table S1 presents the GAMMA results for *TFPI*. Notably, 63 out of the top 100 genes that are predicted by GAMMA to be co-expressed with *TFPI* have Literature Strength (see Table S1 caption). Based on the relative frequency of each term (gene) in MEDLINE, this association was significant ( $P < .01$ ).

Genes already known in the literature to be associated with *TFPI*, and which also appeared in the GAMMA prediction, served as positive controls: trypsin, thrombin, fibrinogen, caveolin-1, vasorin, TFPI-2, PAI-1 and -2, filamin C, glypican 3, adrenomedullin, u-PA, t-PA, thrombospondin, to name a few.

From among the five top co-expressed genes, we chose for experimentation the two genes that were both unknown and had predicted membrane location, namely *KIAA 1644* (putative protein Q3SXP7) and *C6orf105*. We gave priority to the latter because the prediction of it being an androgen-inducible gene coincided with the effects we observed experimentally for the enhancement of TFPI expression and function by androgen.

Once *C6orf105* was chosen, GAMMA was repeated to verify its co-expression patterns and try to identify possible associations. Of note, 23 out of the top 50 genes co-

expressed with *TFPI* (Table S1, blue-colored genes) were also co-expressed with *C6orf105*.

After identifying and ranking the genes co-expressed with *C6orf105*, the top 20 were sent for a literature-based “guilt-by-association” analysis of the published associations they had in common, to predict their functions, phenotypes and disease relevance. This was achieved with the IRIDESCENT software, which uses a term thesaurus to recognize when biological “objects” (e.g., genes, diseases, phenotypes, chemicals, etc.) co-occur within a MEDLINE abstract<sup>3-5</sup>. The thesaurus is constructed using popular and freely available sources for object names (e.g. Entrez gene, OMIM, ChemID database, etc.)<sup>4</sup>. At the time of the study, the IRIDESCENT database of associations was constructed using 18,438,436 MEDLINE records, 55% of which had abstracts with the rest only having titles.

This analysis revealed that 8 out of the top 20 genes consistently co-expressed with *C6orf105* have also been associated with *TFPI* in the literature (Table S2).

Table S3 presents predicted associations for *TFPI* based on co-expression commonalities, with the GAMMA predictions that coincide with known associations (Literature Strength) colored blue, and indicating where same associations are also predicted for *C6orf105* (Yes). Most predicted associations relate to haemostasis, fibrinolysis, cancer, sepsis, lipid metabolism, and acute-phase response and inflammation. One out of three predicted associations are common for both *TFPI* and *C6orf105*.

### **Predicted sequences and domains of ADTRP**

Fig. S1 displays the predicted sequences of the two potential alternatively spliced forms of ADTRP, of 230 aa and 248 aa, with molecular weights of 27, respectively 29 kDa. The second isoform contains an additional stretch of aminoacids between positions 51 and 68 (orange).

Several combinations of transmembrane domains could be predicted, depending on the software employed, and they are marked on the sequences.

Two predicted palmitoylation sites are possible at Cys<sub>7</sub> and Cys<sub>62</sub> or Cys<sub>79</sub> (red). There are no N-glycosylation sites, but several O-glycosylation sites possible.

Phosphorylation could occur at Ser<sub>148/165</sub> and Ser<sub>151/168</sub>, as well as Thr<sub>70/87</sub> and Thr<sub>80/97</sub> and Tyr<sub>201/218</sub> (blue).

### **Androgen effect on ADTRP and TFPI mRNA expression**

Data mining of GEO array profiles revealed significant up-regulation of both ADTRP and TFPI mRNA expression in the LNCaP prostate cancer cell line after incubation with DHT (Fig. S2).

### **REFERENCES**

1. Wren JD. A global meta-analysis of microarray expression data to predict unknown gene functions and estimate the literature-data divide. *Bioinformatics*. 2009;25(13):1694-1701.
2. Daum JR, Wren JD, Daniel JJ, et al. Ska3 is required for spindle checkpoint silencing and the maintenance of chromosome cohesion in mitosis. *Curr Biol*. 2009;19(17):1467-1472.
3. Wren JD. Extending the mutual information measure to rank inferred literature relationships. *BMC Bioinformatics*. 2004;5:145.
4. Wren JD, Bekeredjian R, Stewart JA, Shohet RV, Garner HR. Knowledge discovery by automated identification and ranking of implicit relationships. *Bioinformatics*. 2004;20(3):389-398.
5. Wren JD, Garner HR. Shared relationship analysis: ranking set cohesion and commonalities within a literature-derived relationship network. *Bioinformatics*. 2004;20(2):191-198.

**Table S1. GAMMA results for TFPI (Gene 1)**

**Blue:** genes co-expressed with TFPI that are also co-expressed with ADTRP

**Purity:** The fraction of times gene 1 and gene 2 are co-expressed in the same direction (100% = always)

**# CoX:** # of times gene 1 (TFPI) is seen co-expressed with gene 2 in microarray experiments

**Lit Str (Literature strength):** Cumulative tally of the number of times TFPI was mentioned with the term in MEDLINE (0.5 for every abstract co-occurrence, 0.8 per sentence); **highlighted** for the top 100 genes co-expressed with TFPI

**dMIM:** Mutual information (measure of specificity, >2 is significant)

**Score:** Prioritization of genes that correlates with the probability they share similar or identical functions as gene 1 (TFPI)

**Behavior:** The direction of co-expression (para=parallel, or in the same direction, anti=anti-parallel or opposite directions)

| <u>Gene2</u> | <u>Gene2Name</u>                                                                              | <u>Behavior</u> | <u>Purity</u> | <u># CoX</u> | <u># datasets</u> | <u>Lit. Str.</u> | <u>dMIM</u> | <u>Score</u> | <u>Cell Location</u>                                 | <u>Domains</u>                             |
|--------------|-----------------------------------------------------------------------------------------------|-----------------|---------------|--------------|-------------------|------------------|-------------|--------------|------------------------------------------------------|--------------------------------------------|
| TFPI         | Tissue factor pathway inhibitor (lipoprotein-associated coagulation inhibitor)                | Parallel        | 100%          | 207          | 30                | 0                | 15.72       | 15.72        | Extracellular, Cytoplasm, Plasma membrane            | SP, KUNITZ, KUNITZ, KUNITZ                 |
| KIAA1644     | KIAA1644 protein                                                                              | Parallel        | 100%          | 57           | 2                 | 0                | 6.90        | 6.90         | ?                                                    | SP, TM                                     |
| NCOA2        | Nuclear receptor coactivator 2                                                                | Parallel        | 100%          | 56           | 2                 | 1                | 6.84        | 6.84         | Nucleus                                              | HLH, PAS                                   |
| CBR1         | Carbonyl reductase 1                                                                          | Parallel        | 96%           | 68           | 7                 | 1                | 6.39        | 5.58         | Cytoplasm                                            | ?                                          |
| PRSS1        | Protease, serine, 1 (trypsin 1)                                                               | Parallel        | 100%          | 56           | 3                 | 117              | 5.30        | 5.30         | Extracellular                                        | TRYPSIN, SP                                |
| C6orf105     | Chromosome 6 open reading frame 105<br>Killer cell lectin-like receptor subfamily C, member 1 | Parallel        | 99%           | 97           | 5                 | 0                | 5.12        | 4.96         | ?                                                    | TM, TM, TM, TM, TM, TM                     |
| KLRC1        | Zic family member 1 (odd-paired homolog, Drosophila)                                          | Parallel        | 100%          | 85           | 7                 | 0                | 4.93        | 4.93         | Plasma membrane                                      | TM, LECTIN_C                               |
| ZIC1         | Tubulin, beta 6                                                                               | Parallel        | 100%          | 59           | 5                 | 1                | 4.86        | 4.86         | Nucleus                                              | ZNFC2, ZNFC2, ZNFC2, ZNFC2, ZNFC           |
| TUBB6        | Inter-alpha (globulin) inhibitor H3                                                           | Parallel        | 98%           | 62           | 6                 | 12               | 4.86        | 4.63         | ?                                                    | TUBULIN                                    |
| ITIH3        | Acyl-CoA synthetase medium-chain family member 3                                              | Parallel        | 95%           | 106          | 9                 | 1                | 5.09        | 4.40         | Extracellular                                        | SP, VIT, VWA                               |
| ACSM3        | Nudix (nucleoside diphosphate linked moiety X)-type motif 11                                  | Parallel        | 95%           | 63           | 6                 | 0                | 5.05        | 4.36         | Mitochondrion                                        | ?                                          |
| NUDT11       | Urotensin 2                                                                                   | Parallel        | 96%           | 73           | 8                 | 2                | 4.91        | 4.33         | Cytoplasm                                            | ?                                          |
| UTS2         | Killer cell lectin-like receptor subfamily C, member 2                                        | Parallel        | 98%           | 104          | 6                 | 1                | 4.47        | 4.21         | Plasma membrane                                      | SP                                         |
| KLRC2        | Cell adhesion molecule 1                                                                      | Parallel        | 99%           | 79           | 7                 | 0                | 4.33        | 4.17         | Plasma membrane<br>Plasma membrane, Nucleus          | LECTIN_C, TM                               |
| CADM1        | Sema domain, immunoglobulin domain (Ig), short basic domain, secreted, (semaphorin) 3A        | Parallel        | 95%           | 62           | 10                | 1                | 4.80        | 4.14         | Nucleus                                              | SP, IG, Ig_LIKE, IGC2, Band 4.1            |
| SEMA3A       | Transthyretin (prealbumin, amyloidosis type I)                                                | Parallel        | 96%           | 85           | 10                | 0                | 4.55        | 4.09         | Extracellular                                        | SP, SEMA, PSI, IG                          |
| TTR          | Protein kinase C, beta 1                                                                      | Parallel        | 100%          | 111          | 7                 | 2                | 4.04        | 4.04         | Extracellular<br>Cytoplasm, Plasma membrane, Nucleus | TRANSTHYR, SP                              |
| PRKCB1       | Reelin                                                                                        | Parallel        | 98%           | 59           | 5                 | 0                | 4.26        | 4.04         | Extracellular                                        | C1, C1, C2, STkinase                       |
| RELN         | Carboxypeptidase, vitellogenic-like                                                           | Parallel        | 98%           | 64           | 5                 | 5                | 4.19        | 3.99         | Extracellular                                        | SP, EGF, EGF, EGF, EGF, EGF, EGF           |
| CPVL         | Interferon regulatory factor 4                                                                | Parallel        | 97%           | 92           | 10                | 1                | 4.41        | 3.99         | Extracellular                                        | SP                                         |
| IRF4         | Similar to RIKEN cDNA 2310016C16                                                              | Parallel        | 97%           | 59           | 4                 | 0                | 4.36        | 3.93         | Nucleus, Cytoplasm                                   | IRF                                        |
| LOC493869    | KIAA1576 protein                                                                              | Parallel        | 100%          | 57           | 5                 | 0                | 3.92        | 3.92         | Integral to membrane                                 | TM                                         |
| KIAA1576     | Filamin C, gamma (actin binding protein 280)                                                  | Parallel        | 99%           | 82           | 7                 | 0                | 4.06        | 3.92         | ?                                                    | ?                                          |
| FLNC         | Asialoglycoprotein receptor 1                                                                 | Parallel        | 98%           | 84           | 8                 | 1                | 4.17        | 3.88         | Cytoplasm<br>Plasma membrane, Endoplasmic reticulum  | CH, CH, IGFLMN, IGFLMN, IGFLMN, IC IGFLMN, |
| ASGR1        | Urothelial cancer associated 1                                                                | Parallel        | 100%          | 105          | 9                 | 2                | 3.84        | 3.84         | n/a                                                  | TM, LECTIN_C                               |
| UCA1         | Left-right determination factor 2                                                             | Parallel        | 97%           | 63           | 5                 | 0                | 4.22        | 3.83         | n/a                                                  | n/a                                        |
| LEFTY2       | Solute carrier family 7 (cationic amino acid                                                  | Parallel        | 95%           | 62           | 7                 | 0                | 4.34        | 3.74         | Extracellular                                        | TGFB, SP                                   |
| SLC7A3       |                                                                                               | Parallel        | 98%           | 59           | 3                 | 1                | 3.93        | 3.73         | Plasma membrane,                                     | TM, TM, TM, TM, TM, TM, TM                 |

| <u>Gene2</u> | <u>Gene2Name</u>                                                                                                                                   | <u>Behavior</u> | <u>Purity</u> | <u># CoX</u> | <u># datasets</u> | <u>Lit. Str.</u> | <u>dMIM</u> | <u>Score</u> | <u>Cell Location</u>                                                                                                 | <u>Domains</u>                |
|--------------|----------------------------------------------------------------------------------------------------------------------------------------------------|-----------------|---------------|--------------|-------------------|------------------|-------------|--------------|----------------------------------------------------------------------------------------------------------------------|-------------------------------|
|              | transporter, y+ system), member 3<br>Met proto-oncogene (hepatocyte growth factor receptor)                                                        |                 |               |              |                   |                  |             |              | Nucleus                                                                                                              |                               |
| MET          |                                                                                                                                                    | Parallel        | 98%           | 64           | 5                 | 59               | 3.86        | 3.68         | Plasma membrane                                                                                                      | SEMA, PSI, IPT, IPT, IPT, IPT |
| DFNA5        | Deafness, autosomal dominant 5                                                                                                                     | Parallel        | 94%           | 63           | 9                 | 1                | 4.46        | 3.66         | ?                                                                                                                    | ?                             |
| CPB2         | Carboxypeptidase B2 (plasma)                                                                                                                       | Parallel        | 98%           | 55           | 7                 | 23.6             | 3.84        | 3.64         | ?                                                                                                                    | SP, Zn_pept                   |
| PRSS2        | Protease, serine, 2 (trypsin 2)                                                                                                                    | Parallel        | 100%          | 61           | 4                 | 99               | 3.61        | 3.61         | Extracellular<br>Cytoplasm, Golgi<br>apparatus, Cytoplasmic<br>vesicle                                               | TRYPSIN, SP                   |
| RASIP1       | Ras interacting protein 1                                                                                                                          | Parallel        | 96%           | 75           | 6                 | 2                | 4.07        | 3.60         | Plasma membrane,                                                                                                     | RA                            |
| ROR1         | Receptor tyrosine kinase-like orphan receptor 1<br>Serpine peptidase inhibitor, clade E (nexin,<br>plasminogen activator inhibitor type 1), member | Parallel        | 99%           | 104          | 10                | 1                | 3.69        | 3.58         | Cytoplasm                                                                                                            | IGC2, KRINGLE, Tyr_Kinase,    |
| SERPINE1     | 1<br>Echinoderm microtubule associated protein like                                                                                                | Parallel        | 99%           | 77           | 10                | 86               | 3.71        | 3.57         | Extracellular                                                                                                        | SERPIN, SP                    |
| EML1         | 1                                                                                                                                                  | Parallel        | 100%          | 55           | 7                 | 0                | 3.49        | 3.49         | Cytoplasm                                                                                                            | CC, WD40, WD40, WD40,         |
| MAGEC1       | Melanoma antigen family C, 1                                                                                                                       | Parallel        | 100%          | 62           | 4                 | 0                | 3.47        | 3.47         | Cytoplasm, Nucleus                                                                                                   | MAGE                          |
| CRLF1        | Cytokine receptor-like factor 1                                                                                                                    | Parallel        | 96%           | 83           | 8                 | 0                | 3.83        | 3.43         | Extracellular<br>Plasma membrane,                                                                                    | FN3, FN3, SP, WSXWS           |
| VASN         | Vasorin                                                                                                                                            | Parallel        | 100%          | 58           | 6                 | 2                | 3.42        | 3.42         | Extracellular                                                                                                        | LRR, LRR, LRR, LRR, LRR,      |
| ACF          | Apobec-1 complementation factor                                                                                                                    | Parallel        | 95%           | 64           | 4                 | 0                | 3.85        | 3.34         | Nucleus, Cytoplasm                                                                                                   | RRM, RRM, RRM                 |
| LAMB1        | Laminin, beta 1                                                                                                                                    | Parallel        | 98%           | 63           | 11                | 32               | 3.50        | 3.33         | Extracellular                                                                                                        | LAMNT, EGFLAM, EGFLAM         |
| CFI          | Complement factor I                                                                                                                                | Parallel        | 95%           | 126          | 12                | 1                | 3.85        | 3.33         | Extracellular                                                                                                        | SR, LDLA, LDLA, TRYPSIN, SP   |
| NMU          | Neuromedin U                                                                                                                                       | Parallel        | 97%           | 95           | 9                 | 1                | 3.64        | 3.30         | Extracellular                                                                                                        | SP                            |
| TDGF1        | Teratocarcinoma-derived growth factor 1                                                                                                            | Parallel        | 97%           | 60           | 4                 | 2                | 3.62        | 3.27         | Extracellular<br>Extracellular, Plasma<br>membrane                                                                   | EGF, SP                       |
| NPTX1        | Neuronal pentraxin I                                                                                                                               | Parallel        | 97%           | 125          | 11                | 2                | 3.59        | 3.26         | membrane                                                                                                             | SP, PTX                       |
| SOX2         | SRY (sex determining region Y)-box 2                                                                                                               | Parallel        | 100%          | 57           | 5                 | 3                | 3.26        | 3.26         | Nucleus                                                                                                              | HMG                           |
| GDF3         | Growth differentiation factor 3                                                                                                                    | Parallel        | 92%           | 63           | 6                 | 2                | 4.14        | 3.23         | Extracellular                                                                                                        | TGFB, SP                      |
| F2           | Coagulation factor II (thrombin)                                                                                                                   | Parallel        | 97%           | 109          | 11                | 366              | 3.50        | 3.22         | Extracellular                                                                                                        | GLA, KRINGLE, KRINGLE,        |
| PLA2G4A      | Phospholipase A2, group IVA (cytosolic,<br>calcium-dependent)                                                                                      | Parallel        | 95%           | 81           | 10                | 0                | 3.75        | 3.22         | Cytoplasm, Nucleus                                                                                                   | C2                            |
| RAI14        | Retinoic acid induced 14                                                                                                                           | Parallel        | 97%           | 64           | 9                 | 0                | 3.50        | 3.18         | Cytoplasm<br>Extracellular, Plasma<br>membrane                                                                       | ANK, ANK, ANK, ANK, ANK       |
| NPTX2        | Neuronal pentraxin II                                                                                                                              | Parallel        | 89%           | 64           | 10                | 6                | 4.45        | 3.15         | membrane                                                                                                             | SP, CC                        |
| PIR          | Pirin (iron-binding nuclear protein)                                                                                                               | Parallel        | 97%           | 59           | 9                 | 1                | 3.46        | 3.12         | Nuclear matrix                                                                                                       | ?                             |
| ID1          | Inhibitor of DNA binding 1, dominant negative<br>helix-loop-helix protein                                                                          | Parallel        | 100%          | 79           | 9                 | 6                | 3.12        | 3.12         | Nucleus, Centrosome,<br>Cytoplasm<br>Extracellular,<br>Endoplasmic reticulum,<br>Golgi apparatus, Plasma<br>membrane | HLH                           |
| CP           | Ceruloplasmin (ferroxidase)                                                                                                                        | Parallel        | 98%           | 55           | 9                 | 9                | 3.29        | 3.12         | membrane                                                                                                             | SP                            |
| SAMSN1       | SAM domain, SH3 domain and nuclear<br>localization signals 1                                                                                       | Parallel        | 98%           | 82           | 6                 | 0                | 3.34        | 3.10         | Cytoplasm, Nucleus<br>Plasma membrane,<br>Extracellular,                                                             | SH3, SAM, NLS, NLS, NLS       |
| APOM         | Apolipoprotein M                                                                                                                                   | Parallel        | 100%          | 79           | 7                 | 1                | 3.02        | 3.02         | Endoplasmic reticulum                                                                                                | TM                            |
| DPPA4        | Developmental pluripotency associated 4                                                                                                            | Parallel        | 93%           | 120          | 9                 | 0                | 3.71        | 3.01         | ?                                                                                                                    | ?                             |
| ESM1         | Endothelial cell-specific molecule 1                                                                                                               | Parallel        | 92%           | 130          | 16                | 3                | 3.90        | 2.99         | Extracellular, Cytoplasm                                                                                             | SP, IB                        |
| ASAM         | Adipocyte-specific adhesion molecule                                                                                                               | Parallel        | 98%           | 109          | 7                 | 0                | 3.13        | 2.97         | Plasma membrane                                                                                                      | SP, Ig_LIKE, IGC2, TM         |
| ERRF1        | ERBB receptor feedback inhibitor 1                                                                                                                 | Parallel        | 98%           | 62           | 7                 | 1                | 3.11        | 2.96         | Cytoplasm                                                                                                            | ?                             |
| IGF2BP3      | Insulin-like growth factor 2 mRNA binding<br>protein 3                                                                                             | Parallel        | 98%           | 60           | 4                 | 0                | 3.11        | 2.96         | Cytoplasm, Nucleus                                                                                                   | RRM, RRM, KH, KH, KH, KH,     |

| <u>Gene2</u> | <u>Gene2Name</u>                                                                                                    | <u>Behavior</u> | <u>Purity</u> | <u># CoX</u> | <u># datasets</u> | <u>Lit. Str.</u> | <u>dMIM</u> | <u>Score</u> | <u>Cell Location</u>                                                                     | <u>Domains</u>             |
|--------------|---------------------------------------------------------------------------------------------------------------------|-----------------|---------------|--------------|-------------------|------------------|-------------|--------------|------------------------------------------------------------------------------------------|----------------------------|
| CXCL3        | Chemokine (C-X-C motif) ligand 3                                                                                    | Parallel        | 94%           | 80           | 8                 | 4                | 3.57        | 2.94         | Extracellular                                                                            | SCY, SP, CXC               |
| CTNNA1       | Catenin (cadherin-associated protein), alpha-like 1                                                                 | Parallel        | 100%          | 57           | 6                 | 29               | 2.90        | 2.90         | Cytoplasm<br>Endosome, Golgi                                                             | ?                          |
| SILV         | Silver homolog (mouse)                                                                                              | Parallel        | 97%           | 91           | 10                | 1                | 3.21        | 2.90         | apparatus, Cytoplasm                                                                     | SP, PKD, TM                |
| CLGN         | Calmeglin                                                                                                           | Parallel        | 95%           | 56           | 7                 | 1                | 3.41        | 2.89         | Endoplasmic reticulum                                                                    | SP, TM                     |
| CSAG2        | CSAG family, member 2                                                                                               | Parallel        | 100%          | 56           | 6                 | 0                | 2.88        | 2.88         | ?                                                                                        | ?                          |
| CYTL1        | Cytokine-like 1                                                                                                     | Parallel        | 92%           | 60           | 4                 | 0                | 3.71        | 2.86         | Extracellular                                                                            | SP                         |
| IGFBP1       | Insulin-like growth factor binding protein 1                                                                        | Parallel        | 99%           | 119          | 10                | 4                | 2.93        | 2.86         | Extracellular<br>Cytoplasm, Plasma                                                       | SP, IB, THYRO              |
| CAPN2        | Calpain 2, (m/II) large subunit                                                                                     | Parallel        | 92%           | 59           | 11                | 10               | 3.72        | 2.85         | membrane                                                                                 | CYSPC, CALPAIN_III, EF, EF |
| FOXD1        | Forkhead box D1                                                                                                     | Parallel        | 96%           | 81           | 10                | 1                | 3.18        | 2.84         | Nucleus                                                                                  | FH                         |
| CPS1         | Carbamoyl-phosphate synthetase 1, mitochondrial                                                                     | Parallel        | 97%           | 100          | 12                | 0                | 3.11        | 2.84         | Mitochondrion                                                                            | ?                          |
| GAL          | Galanin                                                                                                             | Parallel        | 100%          | 98           | 8                 | 2                | 2.83        | 2.83         | Extracellular, Secretory granule, Nucleus                                                | SP                         |
| ST3GAL6      | ST3 beta-galactoside alpha-2,3-sialyltransferase 6                                                                  | Parallel        | 92%           | 63           | 7                 | 0                | 3.62        | 2.82         | Golgi apparatus                                                                          | TM                         |
| SERPINA7     | Serpin peptidase inhibitor, clade A (alpha-1 antiproteinase, antitrypsin), member 7                                 | Parallel        | 100%          | 65           | 6                 | 25               | 2.81        | 2.81         | Extracellular<br>Plasma membrane,<br>Cytoplasm, Golgi apparatus, Nucleus, Extracellular, | SERPIN, SP                 |
| PRNP         | Prion protein (p27-30) (Creutzfeldt-Jakob disease, Gerstmann-Strausler-Scheinker syndrome, fatal familial insomnia) | Parallel        | 100%          | 66           | 6                 | 0                | 2.79        | 2.79         | Endoplasmic reticulum<br>Plasma membrane,                                                | SP, TM, TM                 |
| ANXA1        | Annexin A1                                                                                                          | Parallel        | 95%           | 117          | 13                | 3                | 3.25        | 2.77         | Cytoplasm, Nucleus                                                                       | ANX, ANX, ANX, ANX         |
| CSRP2        | Cysteine and glycine-rich protein 2                                                                                 | Parallel        | 99%           | 82           | 8                 | 0                | 2.86        | 2.76         | Nucleus<br>Extracellular,                                                                | LIM, LIM, NLS              |
| FGB          | Fibrinogen beta chain                                                                                               | Parallel        | 97%           | 63           | 9                 | 6                | 3.00        | 2.72         | Endoplasmic reticulum<br>Endoplasmic reticulum,                                          | FBG, SP, CC                |
| MS4A3        | Membrane-spanning 4-domains, subfamily A, member 3 (hematopoietic cell-specific)                                    | Parallel        | 92%           | 63           | 4                 | 0                | 3.45        | 2.70         | Nucleus                                                                                  | TM, TM, TM, TM             |
| G0S2         | G0/G1switch 2                                                                                                       | Parallel        | 95%           | 86           | 10                | 0                | 3.08        | 2.67         | ?                                                                                        | TM, CC                     |
| NR0B2        | Nuclear receptor subfamily 0, group B, member 2                                                                     | Parallel        | 98%           | 55           | 7                 | 0                | 2.82        | 2.67         | Nucleus, Cytoplasm                                                                       | HOLI                       |
| POU5F1       | POU domain, class 5, transcription factor 1                                                                         | Parallel        | 93%           | 114          | 9                 | 2                | 3.31        | 2.66         | Nucleus, Cytoplasm                                                                       | POU, HOX, CC               |
| MLANA        | Melan-A                                                                                                             | Parallel        | 94%           | 63           | 6                 | 3                | 3.24        | 2.66         | Plasma membrane                                                                          | TM                         |
| FAM112B      | Family with sequence similarity 112, member B                                                                       | Parallel        | 100%          | 57           | 2                 | 0                | 2.65        | 2.65         | ?                                                                                        | ?                          |
| MOXD1        | Monoxygenase, DBH-like 1                                                                                            | Parallel        | 97%           | 67           | 7                 | 1                | 2.89        | 2.64         | Endoplasmic reticulum                                                                    | SP                         |
| CD3D         | CD3d molecule, delta (CD3-TCR complex)                                                                              | Parallel        | 98%           | 93           | 7                 | 1                | 2.81        | 2.63         | Plasma membrane                                                                          | SP, ITAM, TM               |
| PCOLCE2      | Procollagen C-endopeptidase enhancer 2                                                                              | Parallel        | 95%           | 112          | 11                | 1                | 3.09        | 2.62         | Extracellular                                                                            | CUB, CUB, C345C, SP        |
| SPTA1        | Spectrin, alpha, erythrocytic 1 (elliptocytosis 2)                                                                  | Parallel        | 97%           | 60           | 6                 | 1                | 2.89        | 2.61         | Plasma membrane<br>Nucleus, Plasma                                                       | SPECTRIN, SPECTRIN,EF, EF  |
| BASP1        | Brain abundant, membrane attached signal protein 1                                                                  | Parallel        | 87%           | 68           | 9                 | 1                | 3.99        | 2.61         | membrane, Cytoplasm<br>Endosome, Golgi                                                   | ?                          |
| TYRP1        | Tyrosinase-related protein 1                                                                                        | Parallel        | 94%           | 93           | 12                | 2                | 3.10        | 2.54         | apparatus                                                                                | TM, SP                     |
| AKR1B1       | Aldo-keto reductase family 1, member B1 (aldose reductase)                                                          | Parallel        | 98%           | 56           | 8                 | 0                | 2.68        | 2.54         | Cytoplasm, Extracellular                                                                 | ALDKR                      |
| AGT          | Angiotensinogen (serpin peptidase inhibitor, clade A, member 8)                                                     | Parallel        | 99%           | 92           | 8                 | 10               | 2.62        | 2.53         | Extracellular                                                                            | SERPIN, SP                 |
| DKK3         | Dickkopf homolog 3 (Xenopus laevis)                                                                                 | Parallel        | 100%          | 58           | 7                 | 0                | 2.53        | 2.53         | Extracellular, Cytoplasm                                                                 | SP, CC                     |
| LIN28        | Lin-28 homolog (C. elegans)                                                                                         | Parallel        | 97%           | 102          | 7                 | 2                | 2.75        | 2.52         | ?                                                                                        | ZnF_C2HC, ZnF_C2HC         |
| NTS          | Neurotensin                                                                                                         | Parallel        | 95%           | 123          | 11                | 1                | 2.92        | 2.52         | Extracellular                                                                            | SP                         |

| <u>Gene2</u> | <u>Gene2Name</u>                                                                        | <u>Behavior</u> | <u>Purity</u> | <u># CoX</u> | <u># datasets</u> | <u>Lit. Str.</u> | <u>dMIM</u> | <u>Score</u> | <u>Cell Location</u>                                                                 | <u>Domains</u>                                |
|--------------|-----------------------------------------------------------------------------------------|-----------------|---------------|--------------|-------------------|------------------|-------------|--------------|--------------------------------------------------------------------------------------|-----------------------------------------------|
| BCHE         | Butyrylcholinesterase                                                                   | Parallel        | 97%           | 62           | 6                 | 2                | 2.77        | 2.51         | Extracellular<br>Cytoplasm, Plasma<br>membrane                                       | TM, SP<br>MYOSIN, IQ, IQ, IQ, PH, PH, B41, CC |
| MYO10        | Myosin X                                                                                | Parallel        | 98%           | 63           | 7                 | 20               | 2.64        | 2.51         | Plasma membrane,<br>Cytoplasm                                                        | SP, TM                                        |
| DCT          | Dopachrome tautomerase (dopachrome delta-isomerase, tyrosine-related protein 2)         | Parallel        | 91%           | 78           | 7                 | 2                | 3.32        | 2.50         | Extracellular                                                                        | SP, EGF, EGFC A, EGFC A,                      |
| LTBP1        | Latent transforming growth factor beta binding protein 1                                | Parallel        | 90%           | 71           | 13                | 5                | 3.39        | 2.48         | ATP-binding cassette, sub-family C (CFTR/MRP), member 2                              | TM, TM, TM, TM, TM, AAA, AAA, AAA             |
| ABCC2        | Phosphatidic acid phosphatase type 2B                                                   | Parallel        | 95%           | 59           | 6                 | 1                | 2.88        | 2.46         | Plasma membrane                                                                      | TM, TM, TM, TM, TM                            |
| PPAP2B       | Deoxynucleotidyltransferase, terminal                                                   | Parallel        | 89%           | 95           | 11                | 0                | 3.44        | 2.46         | Plasma membrane                                                                      | BRCT                                          |
| DNTT         | DEAD (Asp-Glu-Ala-Asp) box polypeptide 3, Y-linked                                      | Parallel        | 94%           | 78           | 7                 | 0                | 3.00        | 2.46         | Nucleus                                                                              | DEXDc, HELIC                                  |
| DDX3Y        |                                                                                         | Parallel        | 91%           | 69           | 8                 | 0                | 3.22        | 2.45         | Nucleus, Cytoplasm<br>Plasma membrane,<br>Endoplasmic reticulum,<br>Golgi apparatus, | TM, LECTIN_C                                  |
| ASGR2        | Asialoglycoprotein receptor 2                                                           | Parallel        | 100%          | 63           | 5                 | 0                | 2.45        | 2.45         | Extracellular                                                                        | ALDKR                                         |
| AKR1C3       | Aldo-keto reductase family 1, member C3 (3-alpha hydroxysteroid dehydrogenase, type II) | Parallel        | 98%           | 64           | 10                | 0                | 2.54        | 2.42         | Cytoplasm                                                                            | SP, CC                                        |
| PTX3         | Pentraxin-related gene, rapidly induced by IL-1 beta                                    | Parallel        | 98%           | 111          | 9                 | 0                | 2.53        | 2.40         | Extracellular<br>Cytoplasm, Endoplasmic<br>reticulum, Golgi<br>apparatus             | SP                                            |
| MGC29506     | Hypothetical protein MGC29506                                                           | Parallel        | 100%          | 59           | 5                 | ?                | 2.39        | 2.39         | Endoplasmic reticulum,<br>Golgi apparatus                                            | SP, P4HC                                      |
| LEPREL1      | Leprecan-like 1                                                                         | Parallel        | 99%           | 75           | 9                 | 0                | 2.49        | 2.39         | Extracellular, Plasma<br>membrane, Cytoplasm                                         | SP, EGF, EGFC A, EGFC A, TM,                  |
| DLK1         | Delta-like 1 homolog (Drosophila)                                                       | Parallel        | 93%           | 122          | 12                | 0                | 2.93        | 2.39         | Extracellular                                                                        | COLL, COLL, COLL, COLL,                       |
| COL9A3       | Collagen, type IX, alpha 3                                                              | Parallel        | 91%           | 93           | 7                 | 0                | 3.09        | 2.36         | Extracellular, Plasma<br>membrane                                                    | EGFLAM, EGFLAM, EGFLAM                        |
| LAMA4        | Laminin, alpha 4                                                                        | Parallel        | 96%           | 79           | 13                | 0                | 2.60        | 2.31         | ?                                                                                    | ?                                             |
| LARP6        | La ribonucleoprotein domain family, member 6                                            | Parallel        | 98%           | 56           | 6                 | 0                | 2.43        | 2.30         | Late endosome,<br>Endoplasmic reticulum,<br>Golgi apparatus                          | SP, TM, RING                                  |
| RNF128       | Ring finger protein 128                                                                 | Parallel        | 96%           | 67           | 8                 | 0                | 2.64        | 2.30         | Cytoplasm                                                                            | ?                                             |
| DDC          | Dopa decarboxylase (aromatic L-amino acid decarboxylase)                                | Parallel        | 88%           | 58           | 7                 | 0                | 3.37        | 2.29         | Cytosol, Nucleus,<br>Microsome                                                       | ?                                             |
| ASS1         | Argininosuccinate synthetase 1                                                          | Parallel        | 100%          | 61           | 6                 | 0                | 2.27        | 2.27         | Extracellular                                                                        | SP, LAMNT, EGFLAM, EGFLAM, EGFL               |
| NTN4         | Netrin 4                                                                                | Parallel        | 98%           | 61           | 10                | 0                | 2.38        | 2.26         | Nucleus                                                                              | CC, NLS                                       |
| HEMGN        | Hemogen                                                                                 | Parallel        | 88%           | 65           | 10                | 0                | 3.35        | 2.26         | Extracellular, Plasma<br>membrane                                                    | EGF, EGF, EGF, EGF, EGF, FN3, FN3             |
| TNC          | Tenascin C (hexabrachion)                                                               | Parallel        | 91%           | 89           | 13                | 0                | 2.98        | 2.24         | ?                                                                                    | PEST, CC, PEST                                |
| TPD52L1      | Tumor protein D52-like 1                                                                | Parallel        | 91%           | 69           | 12                | 0                | 2.93        | 2.23         | Extracellular, Nucleus,<br>Cytoplasm                                                 | SP, IB, THYRO, NLS                            |
| IGFBP3       | Insulin-like growth factor binding protein 3                                            | Parallel        | 99%           | 97           | 10                | 0                | 2.30        | 2.23         | Extracellular                                                                        | INS, SP                                       |
| IGF2         | Insulin-like growth factor 2 (somatomedin A)                                            | Parallel        | 97%           | 70           | 11                | 0                | 2.43        | 2.22         | Cytoplasm, Plasma<br>membrane                                                        | ?                                             |
| GDA          | Guanine deaminase                                                                       | Parallel        | 89%           | 85           | 9                 | 0                | 3.10        | 2.21         | Cytoplasm, Nucleus                                                                   | ?                                             |
| FABP1        | Fatty acid binding protein 1, liver                                                     | Parallel        | 97%           | 120          | 10                | 3                | 2.44        | 2.20         | Plasma membrane,<br>Cytoplasmic vesicle,<br>Endoplasmic reticulum                    | SP, Zn_pept                                   |
| CPE          | Carboxypeptidase E                                                                      | Parallel        | 98%           | 64           | 9                 | 0                | 2.27        | 2.17         |                                                                                      |                                               |

| <u>Gene2</u>             | <u>Gene2Name</u>                                                                                                                        | <u>Behavior</u> | <u>Purity</u> | <u># CoX</u> | <u># datasets</u> | <u>Lit. Str.</u> | <u>dMIM</u> | <u>Score</u> | <u>Cell Location</u>                                                                            | <u>Domains</u>              |
|--------------------------|-----------------------------------------------------------------------------------------------------------------------------------------|-----------------|---------------|--------------|-------------------|------------------|-------------|--------------|-------------------------------------------------------------------------------------------------|-----------------------------|
| CA9                      | Carbonic anhydrase IX<br><a href="#">Serpine peptidase inhibitor, clade E (nexin, plasminogen activator inhibitor type 1), member 2</a> | Parallel        | 95%           | 57           | 8                 | 0                | 2.53        | 2.16         | Plasma membrane, Cytoplasm                                                                      | SP, TM                      |
| <a href="#">SERPINE2</a> |                                                                                                                                         | Parallel        | 92%           | 106          | 12                | 3.6              | 2.72        | 2.15         | Extracellular                                                                                   | SERPIN, SP                  |
| MFAP4                    | Microfibrillar-associated protein 4                                                                                                     | Parallel        | 96%           | 82           | 7                 | 0                | 2.39        | 2.13         | Extracellular                                                                                   | FBG, RGD, SP                |
| UCHL1                    | Ubiquitin carboxyl-terminal esterase L1 (ubiquitin thiolesterase)                                                                       | Parallel        | 91%           | 81           | 11                | 0                | 2.79        | 2.13         | Cytoplasm                                                                                       | ?                           |
| ALDH1A1                  | Aldehyde dehydrogenase 1 family, member A1                                                                                              | Parallel        | 91%           | 105          | 16                | 0                | 2.78        | 2.13         | ?                                                                                               | A2M                         |
| HBZ                      | Hemoglobin, zeta                                                                                                                        | Parallel        | 94%           | 109          | 11                | 0                | 2.52        | 2.12         | ?                                                                                               | ?                           |
| JARID1D                  | Jumonji, AT rich interactive domain 1D                                                                                                  | Parallel        | 91%           | 58           | 5                 | 0                | 2.76        | 2.11         | ?                                                                                               | CC, CC, BRIGHT, PHD, JMJC   |
| MAGEA3                   | Melanoma antigen family A, 3<br><a href="#">Transforming growth factor, beta-induced, 68kDa</a>                                         | Parallel        | 100%          | 64           | 6                 | 0                | 2.10        | 2.10         | Cytoplasm                                                                                       | MAGE                        |
| <a href="#">TGFB1</a>    |                                                                                                                                         | Parallel        | 93%           | 86           | 12                | 0                | 2.60        | 2.09         | Extracellular, Cytoplasm, Nucleus                                                               | SP                          |
| <a href="#">TFPI2</a>    | <a href="#">Tissue factor pathway inhibitor 2</a>                                                                                       | Parallel        | 97%           | 116          | 12                | 37.4             | 2.24        | 2.08         | Extracellular, Plasma membrane, Endoplasmic reticulum                                           | SP, KUNITZ, KUNITZ, KUNITZ  |
| RPS4Y1                   | Ribosomal protein S4, Y-linked 1                                                                                                        | Parallel        | 89%           | 61           | 9                 | 0                | 2.98        | 2.07         | Ribosome                                                                                        | S4, KOW                     |
| FGL1                     | Fibrinogen-like 1                                                                                                                       | Parallel        | 98%           | 80           | 8                 | 0                | 2.22        | 2.06         | Extracellular, Cytoplasm                                                                        | SP, FBG                     |
| ADAM23                   | ADAM metallopeptidase domain 23                                                                                                         | Parallel        | 91%           | 64           | 10                | 0                | 2.70        | 2.01         | Plasma membrane, Extracellular                                                                  | TM, REP, DISINT, ACR, SP    |
| <a href="#">PLAT</a>     | <a href="#">Plasminogen activator, tissue</a>                                                                                           | Parallel        | 95%           | 66           | 11                | 129.2            | 2.31        | 2.01         | Extracellular                                                                                   | SP, FN1, EGF, KRINGLE,      |
| DNER                     | Delta/notch-like EGF repeat containing                                                                                                  | Parallel        | 99%           | 91           | 10                | 0                | 2.06        | 1.99         | Endosome                                                                                        | SP, EGF, EGF, EGFC, EGF,    |
| PRSS23                   | Protease, serine, 23                                                                                                                    | Parallel        | 92%           | 63           | 12                | 0                | 2.55        | 1.99         | ?                                                                                               | TRYPSIN, SP                 |
| <a href="#">FBN1</a>     | <a href="#">Fibrillin 1</a>                                                                                                             | Parallel        | 86%           | 88           | 10                | 0                | 3.08        | 1.98         | Extracellular                                                                                   | EGF, EGFC, EGFC, SP         |
| L1TD1                    | LINE-1 type transposase domain containing 1                                                                                             | Parallel        | 90%           | 106          | 10                | 0                | 2.73        | 1.96         | ?                                                                                               | CC, CC                      |
| AKR1C2                   | Aldo-keto reductase family 1, member C2 (dihydrodiol dehydrogenase 2; bile acid binding protein; 3-alpha hydroxysteroid)                | Parallel        | 98%           | 57           | 6                 | 0                | 2.05        | 1.94         | Cytosol                                                                                         | ?                           |
| <a href="#">FST</a>      | <a href="#">Follistatin</a>                                                                                                             | Parallel        | 94%           | 131          | 14                | 0                | 2.35        | 1.94         | Extracellular                                                                                   | FOLN, KAZAL, FOLN, KAZAL,   |
| <a href="#">SLC7A5</a>   | <a href="#">Solute carrier family 7 (cationic amino acid transporter, y+ system), member 5</a>                                          | Parallel        | 95%           | 61           | 6                 | 0                | 2.26        | 1.94         | Plasma membrane                                                                                 | TM, TM, TM, TM, TM, TM, TM, |
| ADA                      | Adenosine deaminase                                                                                                                     | Parallel        | 93%           | 57           | 6                 | 0                | 2.41        | 1.94         | Plasma membrane, Cytoplasm                                                                      | ?                           |
| SRPX                     | Sushi-repeat-containing protein, X-linked                                                                                               | Parallel        | 94%           | 64           | 12                | 0                | 2.34        | 1.93         | Plasma membrane                                                                                 | SP, SUSHI, SUSHI, SUSHI     |
| PCSK9                    | Proprotein convertase subtilisin/kexin type 9                                                                                           | Parallel        | 87%           | 69           | 6                 | 0                | 2.92        | 1.92         | Extracellular                                                                                   | SP                          |
| NNMT                     | Nicotinamide N-methyltransferase                                                                                                        | Parallel        | 99%           | 77           | 13                | 0                | 2.00        | 1.92         | Cytoplasm                                                                                       | ?                           |
| <a href="#">CAV1</a>     | <a href="#">Caveolin 1, caveolae protein, 22kDa</a>                                                                                     | Parallel        | 99%           | 96           | 14                | 2.9              | 1.97        | 1.91         | Plasma membrane                                                                                 | TM                          |
| DKK1                     | Dickkopf homolog 1 (Xenopus laevis)                                                                                                     | Parallel        | 98%           | 97           | 13                | 0                | 2.02        | 1.90         | Extracellular                                                                                   | SP                          |
| <a href="#">HP</a>       | <a href="#">Haptoglobin</a>                                                                                                             | Parallel        | 95%           | 108          | 7                 | 0                | 2.15        | 1.86         | Extracellular                                                                                   | SUSHI, SUSHI, TRYPSIN, SP   |
| TSPAN7                   | Tetraspanin 7                                                                                                                           | Parallel        | 89%           | 66           | 9                 | 0                | 2.61        | 1.86         | Plasma membrane                                                                                 | TM, TM, TM, TM              |
| <a href="#">FGG</a>      | <a href="#">Fibrinogen gamma chain</a>                                                                                                  | Parallel        | 97%           | 61           | 8                 | 137              | 2.05        | 1.86         | Extracellular, Golgi apparatus                                                                  | FBG, SP, CC, CC             |
| NQO1                     | NAD(P)H dehydrogenase, quinone 1                                                                                                        | Parallel        | 97%           | 73           | 9                 | 0                | 2.02        | 1.86         | Mitochondrion, Microsome, Plasma membrane, Cytoplasm, Nucleus                                   | ?                           |
| MAL                      | Mal, T-cell differentiation protein                                                                                                     | Parallel        | 93%           | 92           | 12                | 0                | 2.26        | 1.85         | Endoplasmic reticulum, Plasma membrane, Golgi apparatus, Mitochondrion, Golgi vesicle, Endosome | TM, TM, TM, TM              |



| <u>Gene2</u> | <u>Gene2Name</u>                                                                                  | <u>Behavior</u> | <u>Purity</u> | <u># CoX</u> | <u># datasets</u> | <u>Lit. Str.</u> | <u>dMIM</u> | <u>Score</u> | <u>Cell Location</u>                                                   | <u>Domains</u>                   |
|--------------|---------------------------------------------------------------------------------------------------|-----------------|---------------|--------------|-------------------|------------------|-------------|--------------|------------------------------------------------------------------------|----------------------------------|
| RHOBTB3      | Rho-related BTB domain containing 3                                                               | Parallel        | 97%           | 58           | 14                | 0                | 2.05        | 1.84         | ?                                                                      | BTB, BTB                         |
| BEX1         | Brain expressed, X-linked 1                                                                       | Parallel        | 95%           | 96           | 9                 | 0                | 2.17        | 1.84         | ?                                                                      | CC                               |
| CGA          | Glycoprotein hormones, alpha polypeptide Synuclein, alpha (non A4 component of amyloid precursor) | Parallel        | 96%           | 55           | 7                 | 0                | 2.03        | 1.82         | Extracellular, Endoplasmic reticulum, Golgi apparatus                  | SP                               |
| SNCA         |                                                                                                   | Parallel        | 88%           | 68           | 7                 | 0                | 2.65        | 1.82         | Cytoplasm, Nucleus                                                     | SYNUC                            |
| ITIH2        | Inter-alpha (globulin) inhibitor H2                                                               | Parallel        | 96%           | 110          | 11                | 0                | 2.03        | 1.81         | Extracellular                                                          | SP, VIT, VWA                     |
| CCL20        | Chemokine (C-C motif) ligand 20                                                                   | Parallel        | 96%           | 69           | 11                | 0                | 2.06        | 1.80         | Extracellular, Cytoplasm                                               | SCY, SP                          |
| PLAC8        | Placenta-specific 8                                                                               | Parallel        | 88%           | 81           | 12                | 0                | 2.67        | 1.80         | Extracellular                                                          | SP                               |
| TMEM158      | Transmembrane protein 158                                                                         | Parallel        | 97%           | 86           | 11                | 0                | 1.97        | 1.77         | ?                                                                      | SP, TM, TM                       |
| MGST1        | Microsomal glutathione S-transferase 1                                                            | Parallel        | 95%           | 56           | 9                 | 0                | 2.09        | 1.77         | Microsome, Endoplasmic reticulum, Nuclear membrane                     | SP                               |
| APOH         | Apolipoprotein H (beta-2-glycoprotein I)                                                          | Parallel        | 98%           | 123          | 10                | 2.6              | 1.90        | 1.76         | Extracellular, Plasma membrane, Cytoplasm                              | SUSHI, SUSHI, SUSHI, SUSHI, SP   |
| SERPINB2     | Serpin peptidase inhibitor, clade B (ovalbumin), member 2                                         | Parallel        | 93%           | 81           | 9                 | 6.9              | 2.22        | 1.76         | Cytoplasm, Extracellular, Nucleus                                      | SP, SERPIN                       |
| NRN1         | Neuritin 1                                                                                        | Parallel        | 85%           | 74           | 8                 | 0                | 2.84        | 1.75         | Extracellular                                                          | SP                               |
| COL6A1       | Collagen, type VI, alpha 1                                                                        | Parallel        | 91%           | 56           | 11                | 0                | 2.32        | 1.75         | Extracellular                                                          | VWA, COLL, COLL, COLL, COLL, VWA |
| INA          | Internexin neuronal intermediate filament protein, alpha                                          | Parallel        | 93%           | 58           | 7                 | 0                | 2.17        | 1.75         | Cytoplasm                                                              | CC, CC                           |
| MMP1         | Matrix metalloproteinase 1 (interstitial collagenase)                                             | Parallel        | 93%           | 83           | 14                | 0                | 2.17        | 1.73         | Extracellular                                                          | ZnMc, HX, HX, HX, HX, SP         |
| ITGB7        | Integrin, beta 7                                                                                  | Parallel        | 93%           | 58           | 8                 | 0                | 2.14        | 1.73         | Plasma membrane                                                        | SP, PSI, TM, VWA                 |
| PLAU         | Plasminogen activator, urokinase                                                                  | Parallel        | 91%           | 57           | 10                | 11.2             | 2.26        | 1.72         | Plasma membrane, Cytoplasm, Extracellular                              | KRINGLE, TRYPSIN, SP             |
| S100B        | S100 calcium binding protein B                                                                    | Parallel        | 89%           | 82           | 9                 | 0                | 2.42        | 1.71         | Cytoplasm, Extracellular, Nucleus                                      | EF, S_100                        |
| MAGEA5       | Melanoma antigen family A, 5                                                                      | Parallel        | 97%           | 68           | 7                 | 0                | 1.84        | 1.69         | ?                                                                      | MAGE                             |
| CNN3         | Calponin 3, acidic                                                                                | Parallel        | 93%           | 73           | 16                | 0                | 2.07        | 1.67         | Cytoplasm                                                              | CH                               |
| AFP          | Alpha-fetoprotein                                                                                 | Parallel        | 96%           | 119          | 12                | 0                | 1.89        | 1.66         | Extracellular, Cytoplasm                                               | Albumin, Albumin, Albumin, SP    |
| APOA1        | Apolipoprotein A-I                                                                                | Parallel        | 98%           | 91           | 11                | 1.5              | 1.77        | 1.66         | Extracellular, Cytoplasm                                               | SP, CC                           |
| TSPAN8       | Tetraspanin 8                                                                                     | Parallel        | 83%           | 98           | 11                | 0                | 2.93        | 1.65         | Plasma membrane                                                        | TM, TM, TM, TM                   |
| ALAS2        | Aminolevulinatase, delta-, synthase 2 (sideroblastic/hypochromic anemia)                          | Parallel        | 92%           | 60           | 5                 | 0                | 2.13        | 1.64         | Mitochondrion                                                          | ?                                |
| PAGE1        | P antigen family, member 1 (prostate associated)                                                  | Parallel        | 100%          | 58           | 7                 | 0                | 1.64        | 1.64         | Cytoplasm                                                              | ?                                |
| SLC2A3       | Solute carrier family 2 (facilitated glucose transporter), member 3                               | Parallel        | 83%           | 63           | 11                | 0                | 2.89        | 1.63         | Plasma membrane                                                        | TM, TM, TM, TM, TM, TM, TM, TM   |
| PEG10        | Paternally expressed 10                                                                           | Parallel        | 91%           | 100          | 18                | 0                | 2.16        | 1.63         | Nucleus, Cytoplasm                                                     | CC, ZNFC2                        |
| GAGE7B       | G antigen 7B                                                                                      | Parallel        | 98%           | 64           | 4                 | 0                | 1.70        | 1.62         | ?                                                                      | ?                                |
| LGALS3       | Lectin, galactoside-binding, soluble, 3                                                           | Parallel        | 86%           | 66           | 12                | 0                | 2.52        | 1.62         | Cytoplasm, Nucleus, Extracellular                                      | GLECT                            |
| RHAG         | Rh-associated glycoprotein                                                                        | Parallel        | 81%           | 102          | 11                | 0                | 2.95        | 1.59         | Plasma membrane                                                        | TM, TM, TM, TM, TM, TM, TM, TM   |
| PRSS3        | Protease, serine, 3 (mesotrypsin)                                                                 | Parallel        | 98%           | 59           | 4                 | 0                | 1.67        | 1.59         | ?                                                                      | SP, TRYPSIN                      |
| SFRP1        | Secreted frizzled-related protein 1                                                               | Parallel        | 88%           | 76           | 10                | 0                | 2.31        | 1.59         | Extracellular                                                          | FZ, C345C, SP                    |
| F5           | Coagulation factor V (proaccelerin, labile factor)                                                | Parallel        | 80%           | 66           | 11                | 40.6             | 3.03        | 1.57         | Extracellular, Plasma membrane, Endoplasmic reticulum, Golgi apparatus | F58C, F58C, SP                   |
| CDCA7        | Cell division cycle associated 7                                                                  | Parallel        | 91%           | 58           | 8                 | 0                | 2.02        | 1.54         | Nucleus                                                                | ?                                |
| NDN          | Necdin homolog (mouse)                                                                            | Parallel        | 90%           | 59           | 7                 | 0                | 2.11        | 1.53         | Nucleus, Cytoplasm                                                     | MAGE                             |

| <u>Gene2</u> | <u>Gene2Name</u>                                                                          | <u>Behavior</u> | <u>Purity</u> | <u># CoX</u> | <u># datasets</u> | <u>Lit. Str.</u> | <u>dMIM</u> | <u>Score</u> | <u>Cell Location</u>                                              | <u>Domains</u>                                                               |
|--------------|-------------------------------------------------------------------------------------------|-----------------|---------------|--------------|-------------------|------------------|-------------|--------------|-------------------------------------------------------------------|------------------------------------------------------------------------------|
| AMBP         | Alpha-1-microglobulin/bikunin precursor                                                   | Parallel        | 98%           | 118          | 10                | 1                | 1.60        | 1.52         | Extracellular, Golgi apparatus, Endoplasmic reticulum, Cytoplasm, | SP, KUNITZ, KUNITZ                                                           |
| FABP7        | Fatty acid binding protein 7, brain                                                       | Parallel        | 93%           | 59           | 9                 | 0                | 1.88        | 1.52         | Plasma membrane                                                   | ?                                                                            |
| TM4SF1       | Transmembrane 4 L six family member 1                                                     | Parallel        | 93%           | 60           | 16                | 0                | 1.87        | 1.52         | Cytoplasm                                                         | TM, TM, TM, TM                                                               |
| WNT5A        | Wingless-type MMTV integration site family, member 5A                                     | Parallel        | 86%           | 72           | 17                | 0                | 2.34        | 1.50         | Plasma membrane                                                   | SP, WNT                                                                      |
| FN1          | Fibronectin 1                                                                             | Parallel        | 91%           | 81           | 13                | 0                | 1.96        | 1.49         | Extracellular,                                                    | FN1, FN1, FN1, FN1, FN1, FN1, FN1, FN2, FN3, FN3, FN3, FN3, FN3, FN3, FN3, F |
| SCG2         | Secretogranin II (chromogranin C)                                                         | Parallel        | 89%           | 57           | 10                | 0                | 2.06        | 1.48         | Endoplasmic reticulum                                             | FN1, RGD, SP                                                                 |
| GNG11        | Guanine nucleotide binding protein (G protein), gamma 11                                  | Parallel        | 81%           | 70           | 12                | 0                | 2.71        | 1.46         | Golgi apparatus                                                   | SP, CC                                                                       |
| GPNMB        | Glycoprotein (transmembrane) nmb                                                          | Parallel        | 88%           | 77           | 13                | 0                | 2.10        | 1.45         | ?                                                                 | CC                                                                           |
| APOC1        | Apolipoprotein C-I                                                                        | Parallel        | 90%           | 58           | 14                | 0                | 1.97        | 1.42         | Plasma membrane,                                                  | SP, PKD, TM                                                                  |
| AHSG         | Alpha-2-HS-glycoprotein                                                                   | Parallel        | 96%           | 85           | 12                | 0                | 1.58        | 1.42         | Endosome                                                          | SP                                                                           |
| ADAMTS1      | ADAM metallopeptidase with thrombospondin type 1 motif, 1                                 | Parallel        | 92%           | 60           | 8                 | 0                | 1.83        | 1.41         | Extracellular,                                                    | CYSTATIN, CYSTATIN, SP                                                       |
| BDNF         | Brain-derived neurotrophic factor                                                         | Parallel        | 74%           | 69           | 6                 | 0                | 3.47        | 1.40         | Extracellular, Golgi apparatus                                    | SP, ACR, TSP1, TSP1, TSP1                                                    |
| CDH2         | Cadherin 2, type 1, N-cadherin (neuronal)                                                 | Parallel        | 91%           | 68           | 11                | 0                | 1.85        | 1.40         | Extracellular, Secretory granule, Golgi apparatus                 | ?                                                                            |
| APOA2        | Apolipoprotein A-II                                                                       | Parallel        | 100%          | 87           | 9                 | 2.1              | 1.40        | 1.40         | Plasma membrane                                                   | Cadherin, Cadherin, Cadherin,                                                |
| NR2F2        | Nuclear receptor subfamily 2, group F, member 2                                           | Parallel        | 82%           | 91           | 12                | 0                | 2.38        | 1.33         | Extracellular                                                     | SP                                                                           |
| FSTL1        | Follistatin-like 1                                                                        | Parallel        | 90%           | 69           | 10                | 0                | 1.83        | 1.33         | Nucleus                                                           | ZnF_C4, HOLI                                                                 |
| PRAME        | Preferentially expressed antigen in melanoma                                              | Parallel        | 87%           | 85           | 13                | 0                | 1.97        | 1.30         | Extracellular                                                     | FOLN, KAZAL, SP, CC, EF, EF                                                  |
| HTRA1        | HtrA serine peptidase 1                                                                   | Parallel        | 97%           | 60           | 7                 | 0                | 1.44        | 1.30         | ?                                                                 | ?                                                                            |
| GAGE6        | G antigen 6                                                                               | Parallel        | 100%          | 58           | 2                 | 0                | 1.29        | 1.29         | Extracellular                                                     | IB, KAZAL, TRYPSIN, PDZ, SP                                                  |
| LUM          | Lumican                                                                                   | Parallel        | 86%           | 111          | 17                | 0                | 2.05        | 1.29         | Extracellular                                                     | ?                                                                            |
| THBS2        | Thrombospondin 2                                                                          | Parallel        | 81%           | 85           | 14                | 0.5              | 2.38        | 1.27         | Extracellular                                                     | SP, LRR, LRR, LRR, LRR, LRR, LRR                                             |
| CXCR4        | Chemokine (C-X-C motif) receptor 4                                                        | Parallel        | 78%           | 55           | 10                | 0                | 2.64        | 1.26         | Extracellular, Plasma membrane,                                   | TSPN, VWC, TSP1, TSP1, TSP1, EGF                                             |
| ORM2         | Orosomucoid 2                                                                             | Parallel        | 90%           | 67           | 7                 | 0                | 1.71        | 1.23         | Plasma membrane,                                                  | TM, TM, TM, TM, TM, TM, TM                                                   |
| ADM          | Adrenomedullin                                                                            | Parallel        | 95%           | 57           | 7                 | 14.5             | 1.44        | 1.23         | Cytoplasm                                                         | SP                                                                           |
| GPC3         | Glypican 3                                                                                | Parallel        | 93%           | 94           | 12                | 2.8              | 1.54        | 1.22         | Extracellular, Cytoplasm                                          | SP                                                                           |
| FHL1         | Four and a half LIM domains 1                                                             | Parallel        | 93%           | 57           | 7                 | 0                | 1.51        | 1.22         | Extracellular, Plasma membrane,                                   | LIM, LIM, LIM, LIM                                                           |
| TACSTD2      | Tumor-associated calcium signal transducer 2                                              | Parallel        | 83%           | 60           | 8                 | 0                | 2.10        | 1.21         | Plasma membrane,                                                  | THYRO, TM, SP                                                                |
| GSTM3        | Glutathione S-transferase M3 (brain)                                                      | Parallel        | 66%           | 64           | 11                | 0                | 4.27        | 1.21         | Cytoplasm                                                         | ?                                                                            |
| ANLN         | Anillin, actin binding protein                                                            | Parallel        | 96%           | 68           | 11                | 0                | 1.38        | 1.20         | Nucleus, Nucleolus                                                | CC, CC, PH                                                                   |
| APOB         | Apolipoprotein B (including Ag(x) antigen)                                                | Parallel        | 97%           | 66           | 10                | 12.2             | 1.27        | 1.15         | Extracellular,                                                    | SP, CC, CC, CC                                                               |
| CDH1         | Cadherin 1, type 1, E-cadherin (epithelial)                                               | Parallel        | 77%           | 79           | 13                | 0                | 2.41        | 1.11         | Extracellular, Endoplasmic reticulum,                             | SP, CC, CC, CC                                                               |
| CTGF         | Connective tissue growth factor                                                           | Parallel        | 89%           | 73           | 18                | 0.5              | 1.50        | 1.06         | Golgi apparatus                                                   | SP, IB, VWC, CT, TSP1                                                        |
| IGJ          | Immunoglobulin J polypeptide, linker protein for immunoglobulin alpha and mu polypeptides | Parallel        | 86%           | 66           | 13                | 0                | 1.64        | 1.06         | Extracellular, Golgi apparatus,                                   | ?                                                                            |

| <u>Gene2</u> | <u>Gene2Name</u>                                                                                 | <u>Behavior</u> | <u>Purity</u> | <u># CoX</u> | <u># datasets</u> | <u>Lit. Str.</u> | <u>dMIM</u> | <u>Score</u> | <u>Cell Location</u>                                                                                                       | <u>Domains</u>                       |
|--------------|--------------------------------------------------------------------------------------------------|-----------------|---------------|--------------|-------------------|------------------|-------------|--------------|----------------------------------------------------------------------------------------------------------------------------|--------------------------------------|
| NPY1R        | Neuropeptide Y receptor Y1                                                                       | Parallel        | 70%           | 61           | 11                | 0                | 2.84        | 1.00         | Nucleus, Extracellular                                                                                                     |                                      |
| STAR         | Steroidogenic acute regulator                                                                    | Parallel        | 67%           | 58           | 7                 | 0                | 3.21        | 0.98         | Plasma membrane<br>Mitochondrion<br>Plasma membrane,<br>Cytoplasm, Endoplasmic<br>reticulum, Golgi<br>apparatus, Endosome, | TM, TM, TM, TM, TM, TM, TM<br>START  |
| MME          | Membrane metallo-endopeptidase                                                                   | Parallel        | 79%           | 56           | 10                | 0                | 2.00        | 0.97         | Extracellular matrix                                                                                                       | CC, TM, NLS                          |
| HBE1         | Hemoglobin, epsilon 1                                                                            | Parallel        | 83%           | 71           | 10                | 0                | 1.66        | 0.96         | Cytoplasm, Nucleus                                                                                                         | ?                                    |
| PKIB         | Protein kinase (cAMP-dependent, catalytic)<br>inhibitor beta                                     | Parallel        | 64%           | 78           | 8                 | 0                | 3.17        | 0.84         | Nucleus<br>Plasma membrane,                                                                                                | NES                                  |
| TACSTD1      | Tumor-associated calcium signal transducer 1                                                     | Parallel        | 82%           | 74           | 12                | 0                | 1.47        | 0.83         | Extracellular                                                                                                              | SP, TM, THYRO                        |
| SPP1         | Secreted phosphoprotein 1 (osteopontin, bone<br>sialoprotein I, early T-lymphocyte activation 1) | Parallel        | 86%           | 80           | 14                | 0                | 1.23        | 0.79         | Extracellular                                                                                                              | SP                                   |
| EFEMP1       | EGF-containing fibulin-like extracellular matrix<br>protein 1                                    | Parallel        | 71%           | 94           | 14                | 0                | 1.88        | 0.68         | Extracellular                                                                                                              | EGFCA, EGFC, EGFL, SP                |
| POSTN        | Periostin, osteoblast specific factor                                                            | Parallel        | 77%           | 61           | 10                | 0                | 1.49        | 0.68         | ?                                                                                                                          | ?                                    |
| COL1A2       | Collagen, type I, alpha 2                                                                        | Parallel        | 70%           | 70           | 12                | 0                | 1.65        | 0.57         | Extracellular                                                                                                              | COLFI, SP, COLL, COLL, COLL, COLL    |
| PTPRC        | Protein tyrosine phosphatase, receptor type, C                                                   | Parallel        | 63%           | 60           | 10                | 0                | 2.13        | 0.54         | Plasma membrane                                                                                                            | TM, FN3, FN3, Tyr_Phos, Tyr_Phos, SF |
| C4orf18      | Chromosome 4 open reading frame 18                                                               | Parallel        | 55%           | 75           | 11                | ?                | 3.24        | 0.53         | ?                                                                                                                          | ?                                    |
| COL1A1       | Collagen, type I, alpha 1                                                                        | Parallel        | 75%           | 57           | 11                | 0                | 1.22        | 0.52         | Extracellular                                                                                                              | VWC, COLL, COLL, COLL, COLL, COL     |
| FXJD3        | FXJD domain containing ion transport regulator<br>3                                              | Parallel        | 58%           | 62           | 9                 | 0                | 2.45        | 0.48         | Plasma membrane,<br>Cytoplasm                                                                                              | SP, TM                               |
| S100P        | S100 calcium binding protein P                                                                   | Parallel        | 68%           | 59           | 16                | 0                | 1.25        | 0.39         | Cytoplasm, Plasma<br>membrane                                                                                              | EF, EF                               |
| SUSD3        | Sushi domain containing 3                                                                        | Anti            | 100%          | 64           | 5                 | 0                | 5.65        | 5.65         | Integral to membrane                                                                                                       | SUSHI, TM                            |
| PIB5PA       | Phosphatidylinositol (4,5) bisphosphate 5-<br>phosphatase, A                                     | Anti            | 100%          | 56           | 4                 | 0                | 5.25        | 5.25         | Cytoplasm, Plasma<br>membrane                                                                                              | I_Phosphatase                        |
| EMG1         | EMG1 nucleolar protein homolog (S. cerevisiae)                                                   | Anti            | 100%          | 57           | 3                 | 0                | 5.14        | 5.14         | Nucleus, Nucleolus                                                                                                         | ?                                    |
| PARP9        | Poly (ADP-ribose) polymerase family, member<br>9                                                 | Anti            | 100%          | 57           | 4                 | 0                | 5.08        | 5.08         | Nucleus                                                                                                                    | ?                                    |
| RTN1         | Reticulon 1                                                                                      | Anti            | 100%          | 59           | 3                 | 0                | 4.92        | 4.92         | Endoplasmic reticulum                                                                                                      | TM, TM                               |
| FLJ20273     | RNA-binding protein                                                                              | Anti            | 94%           | 63           | 6                 | ?                | 5.95        | 4.88         | ?                                                                                                                          | RRM, RRM, RRM                        |
| BATF         | Basic leucine zipper transcription factor, ATF-<br>like                                          | Anti            | 100%          | 59           | 5                 | 0                | 4.78        | 4.78         | Nucleus                                                                                                                    | BRLZ, CC                             |
| CAPN13       | Calpain 13                                                                                       | Anti            | 100%          | 57           | 2                 | 0                | 4.10        | 4.10         | Cytoplasm                                                                                                                  | CYSPC, CALPAIN_III                   |
| ESR1         | Estrogen receptor 1                                                                              | Anti            | 96%           | 56           | 3                 | 2.6              | 4.52        | 4.05         | Nucleus, Cytoplasm                                                                                                         | ZnF_C4, HOLI                         |
| COL10A1      | Collagen, type X, alpha 1(Schmid metaphyseal<br>chondrodysplasia)                                | Anti            | 98%           | 56           | 4                 | 0                | 4.02        | 3.81         | Extracellular                                                                                                              | COLL, COLL, COLL, COLL, SP           |
| LOC124220    | Similar to common salivary protein 1                                                             | Anti            | 100%          | 57           | 4                 | ?                | 3.71        | 3.71         | ?                                                                                                                          | SP                                   |
| HDC          | Histidine decarboxylase                                                                          | Anti            | 100%          | 65           | 5                 | 0                | 3.58        | 3.58         | Cytoplasm                                                                                                                  | ?                                    |
| ENPP5        | Ectonucleotide<br>pyrophosphatase/phosphodiesterase 5<br>(putative function)                     | Anti            | 98%           | 58           | 5                 | 0                | 3.74        | 3.55         | ?                                                                                                                          | TM                                   |
| HLA-F        | Major histocompatibility complex, class I, F                                                     | Anti            | 100%          | 56           | 5                 | 0                | 3.46        | 3.46         | Plasma membrane                                                                                                            | SP, IGC, TM                          |
| CTSO         | Cathepsin O                                                                                      | Anti            | 93%           | 58           | 5                 | 0                | 4.11        | 3.32         | Lysosome, Extracellular                                                                                                    | PPTC1, SP                            |
| PIP          | Prolactin-induced protein                                                                        | Anti            | 95%           | 58           | 3                 | 0                | 3.49        | 2.98         | Extracellular                                                                                                              | SP                                   |
| GBP5         | Guanylate binding protein 5                                                                      | Anti            | 100%          | 60           | 5                 | 0                | 2.96        | 2.96         | ?                                                                                                                          | CC                                   |
| DNAL1        | Dynein, axonemal, light intermediate chain 1                                                     | Anti            | 96%           | 56           | 5                 | 0                | 3.25        | 2.91         | ?                                                                                                                          | CC                                   |
| TMEM125      | Transmembrane protein 125                                                                        | Anti            | 100%          | 56           | 2                 | 0                | 2.87        | 2.87         | ?                                                                                                                          | TM, TM, TM, TM                       |
| GJA4         | Gap junction protein, alpha 4, 37kDa                                                             | Anti            | 96%           | 57           | 5                 | 0                | 3.09        | 2.78         | Plasma membrane                                                                                                            | TM, CNX, TM, TM                      |
| TMEM16A      | Transmembrane protein 16A                                                                        | Anti            | 95%           | 58           | 6                 | 0                | 3.24        | 2.77         | Integral to membrane                                                                                                       | TM, TM, TM, TM, TM                   |

| <u>Gene2</u> | <u>Gene2Name</u>                                                                                       | <u>Behavior</u> | <u>Purity</u> | <u># CoX</u> | <u># datasets</u> | <u>Lit. Str.</u> | <u>dMIM</u> | <u>Score</u> | <u>Cell Location</u>                                                                               | <u>Domains</u>                         |
|--------------|--------------------------------------------------------------------------------------------------------|-----------------|---------------|--------------|-------------------|------------------|-------------|--------------|----------------------------------------------------------------------------------------------------|----------------------------------------|
| CD14         | <a href="#">CD14 molecule</a>                                                                          | Anti            | 97%           | 63           | 7                 | 1.3              | 2.90        | 2.63         | Cell surface, Extracellular, Endoplasmic reticulum, Golgi apparatus, Lysosome, Endosome, Cytoplasm | LRR, SP, LRR, LRR                      |
| CYP2B7P1     | Cytochrome P450, family 2, subfamily B, polypeptide 7 pseudogene 1                                     | Anti            | 90%           | 58           | 5                 | 0                | 3.63        | 2.62         | n/a                                                                                                | n/a                                    |
| HLA-DQB1     | Major histocompatibility complex, class II, DQ beta 1                                                  | Anti            | 100%          | 76           | 6                 | 0                | 2.61        | 2.61         | Plasma membrane                                                                                    | TM, IGC, SP                            |
| VAV1         | <a href="#">Vav 1 oncogene</a>                                                                         | Anti            | 76%           | 59           | 7                 | 0                | 5.88        | 2.61         | Cytoplasm, Nucleus, Plasma membrane                                                                | CH, RHOGEF, PH, C1, SH3, SH2, SH3      |
| PDZK1IP1     | PDZK1 interacting protein 1                                                                            | Anti            | 96%           | 55           | 7                 | 0                | 2.80        | 2.51         | Plasma membrane                                                                                    | TM, SP                                 |
| CCL4         | Chemokine (C-C motif) ligand 4                                                                         | Anti            | 100%          | 91           | 9                 | 0                | 2.35        | 2.35         | Extracellular, Endoplasmic reticulum, Golgi apparatus                                              | SCY, SP                                |
| TRPS1        | Trichorhinophalangeal syndrome 1                                                                       | Anti            | 88%           | 65           | 6                 | 0                | 3.37        | 2.28         | Nucleus                                                                                            | ZNFC2, ZNF_GATA, ZNFC2,                |
| EFHD1        | EF-hand domain family, member D1                                                                       | Anti            | 100%          | 57           | 2                 | 0                | 2.27        | 2.27         | ?                                                                                                  | EF, EF, CC                             |
| HCST         | Hematopoietic cell signal transducer                                                                   | Anti            | 100%          | 65           | 6                 | 0                | 2.15        | 2.15         | Plasma membrane                                                                                    | TM                                     |
| VAV3         | <a href="#">Vav 3 oncogene</a>                                                                         | Anti            | 84%           | 70           | 10                | 0                | 3.56        | 2.13         | Cytoplasm                                                                                          | CH, RHOGEF, PH, C1, SH3, SH2, SH3      |
| CSF1R        | Colony stimulating factor 1 receptor, formerly McDonough feline sarcoma viral (v-fms) oncogene homolog | Anti            | 97%           | 71           | 8                 | 0                | 2.26        | 2.07         | Plasma membrane                                                                                    | TM, Ig_LIKE, Ig_LIKE, IGC2,            |
| IFIT1        | Interferon-induced protein with tetratricopeptide repeats 1                                            | Anti            | 100%          | 64           | 6                 | 0                | 2.04        | 2.04         | Cytoplasm, Nucleolus                                                                               | TPR, TPR, TPR, TPR, TPR, TPR           |
| SMOC2        | SPARC related modular calcium binding 2                                                                | Anti            | 92%           | 71           | 7                 | 0                | 2.63        | 2.02         | Extracellular                                                                                      | KAZAL, THYRO, THYRO, SP                |
| GZMA         | Granzyme A (granzyme 1, cytotoxic T-lymphocyte-associated serine esterase 3)                           | Anti            | 98%           | 62           | 7                 | 0                | 2.07        | 1.97         | Extracellular, Cytoplasm                                                                           | TRYPSIN, SP                            |
| CXCL10       | Chemokine (C-X-C motif) ligand 10                                                                      | Anti            | 93%           | 68           | 8                 | 0                | 2.23        | 1.77         | Extracellular                                                                                      | SP, SCY                                |
| CD93         | CD93 molecule                                                                                          | Anti            | 91%           | 58           | 8                 | 0                | 2.23        | 1.70         | Plasma membrane                                                                                    | TM, LECTIN_C, EGFL, EGFL,              |
| HCK          | Hemopoietic cell kinase                                                                                | Anti            | 98%           | 57           | 9                 | 0                | 1.80        | 1.70         | Cytoplasm, Plasma membrane, Lysosome                                                               | SH3, SH2, Tyr_Kinase                   |
| ARHGAP25     | Rho GTPase activating protein 25                                                                       | Anti            | 97%           | 58           | 8                 | 0                | 1.82        | 1.64         | ?                                                                                                  | CC, PH, RHOGAP                         |
| IFI27        | Interferon, alpha-inducible protein 27                                                                 | Anti            | 99%           | 79           | 9                 | 0                | 1.63        | 1.57         | ?                                                                                                  | TM, TM                                 |
| C10orf116    | Chromosome 10 open reading frame 116                                                                   | Anti            | 90%           | 62           | 5                 | ?                | 1.90        | 1.40         | ?                                                                                                  | ?                                      |
| HLA-DRB4     | Major histocompatibility complex, class II, DR beta 4                                                  | Anti            | 100%          | 76           | 5                 | 0                | 1.31        | 1.31         | Plasma membrane                                                                                    | SP, IGC, TM                            |
| HLA-DRB1     | <a href="#">Major histocompatibility complex, class II, DR beta 1</a>                                  | Anti            | 97%           | 93           | 10                | 0                | 1.41        | 1.28         | Plasma membrane, Endosome, Lysosome                                                                | SP, IGC, TM                            |
| KIT          | V-kit Hardy-Zuckerman 4 feline sarcoma viral oncogene homolog                                          | Anti            | 75%           | 60           | 9                 | 0                | 3.02        | 1.27         | Plasma membrane                                                                                    | Ig_LIKE, IGC2, Ig_LIKE, Tyr_Kinase, TI |
| TYROBP       | TYRO protein tyrosine kinase binding protein                                                           | Anti            | 100%          | 68           | 8                 | 0                | 1.27        | 1.27         | Plasma membrane, Cell surface, Cytoplasm                                                           | TM, SP, ITAM                           |
| HOXB2        | Homeobox B2                                                                                            | Anti            | 73%           | 56           | 8                 | 0                | 3.22        | 1.26         | Nucleus                                                                                            | HOX                                    |
| COL11A1      | Collagen, type XI, alpha 1                                                                             | Anti            | 74%           | 68           | 9                 | 0                | 3.02        | 1.20         | Extracellular                                                                                      | COLL, COLL, COLL, COLL, SP, TSPN       |
| HLA-DPA1     | Major histocompatibility complex, class II, DP alpha 1                                                 | Anti            | 99%           | 70           | 11                | 0                | 1.18        | 1.13         | Plasma membrane                                                                                    | SP, IGC, TM                            |
| CD33         | <a href="#">CD33 molecule</a>                                                                          | Anti            | 56%           | 55           | 7                 | 0                | 6.23        | 1.12         | Plasma membrane                                                                                    | SP, IG, IG, TM                         |
| PLEK         | <a href="#">Pleckstrin</a>                                                                             | Anti            | 91%           | 64           | 9                 | 0                | 1.45        | 1.08         | Plasma membrane                                                                                    | PH, PH, DSH                            |
| RGS2         | Regulator of G-protein signalling 2, 24kDa                                                             | Anti            | 80%           | 56           | 10                | 0                | 2.06        | 1.07         | Plasma membrane, Nucleus, Cytoplasm                                                                | RGS                                    |
| F13A1        | <a href="#">Coagulation factor XIII, A1 polypeptide</a>                                                | Anti            | 89%           | 66           | 12                | 0.5              | 1.49        | 1.06         | Extracellular, Nucleus, Cytoplasm                                                                  | TRANSGLUT, TGC                         |

| <u>Gene2</u> | <u>Gene2Name</u>                | <u>Behavior</u> | <u>Purity</u> | <u># CoX</u> | <u># datasets</u> | <u>Lit. Str.</u> | <u>dMIM</u> | <u>Score</u> | <u>Cell Location</u>                                             | <u>Domains</u>          |
|--------------|---------------------------------|-----------------|---------------|--------------|-------------------|------------------|-------------|--------------|------------------------------------------------------------------|-------------------------|
| GMFG         | Glia maturation factor, gamma   | Anti            | 78%           | 59           | 8                 | 0                | 2.10        | 0.99         | ?                                                                | ADF                     |
| HBB          | Hemoglobin, beta                | Anti            | 91%           | 77           | 12                | 0                | 1.30        | 0.98         | Extracellular                                                    | ?                       |
| ZMAT1        | Zinc finger, matrin type 1      | Anti            | 78%           | 59           | 6                 | 0                | 1.86        | 0.88         | Nucleus                                                          | ZNFC2                   |
| SPARCL1      | SPARC-like 1 (mast9, hevin)     | Anti            | 95%           | 55           | 8                 | 0                | 0.99        | 0.84         | Extracellular                                                    | SP, CC, FOLN, KAZAL, EF |
| HBD          | Hemoglobin, delta               | Anti            | 72%           | 68           | 10                | 0                | 1.47        | 0.55         | ?                                                                | ?                       |
| AIF1         | Allograft inflammatory factor 1 | Anti            | 67%           | 60           | 10                | 0                | 1.84        | 0.55         | Cytoplasm, Nucleus                                               | EF                      |
| SRGN         | Serglycin                       | Anti            | 58%           | 93           | 17                | 0                | 1.95        | 0.38         | Extracellular, Cytoplasm                                         | SP                      |
| MGP          | Matrix Gla protein              | Anti            | 66%           | 67           | 15                | 0                | 1.26        | 0.36         | Extracellular                                                    | GLA, SP                 |
| CD53         | CD53 molecule                   | Anti            | 57%           | 65           | 12                | 1.5              | 1.75        | 0.32         | Plasma membrane<br>Extracellular, Plasma<br>membrane, Cytoplasm, | TM, TM, TM, TM          |
| IL1B         | Interleukin 1, beta             | Anti            | 51%           | 73           | 10                | 4.1              | 1.57        | 0.20         | Nucleus                                                          | IL1                     |

**Table S2. 8 out of the top 20 genes consistently co-expressed with C6orf105, have also been associated with TFPI in the literature (red)**

| Gene name                                    | Literature references                                                                                 |
|----------------------------------------------|-------------------------------------------------------------------------------------------------------|
| C3orf57                                      |                                                                                                       |
| SPANX family, member C                       |                                                                                                       |
| Alpha-1-microglobulin/bikunin                | Macedo-Ribeiro S. PLoS ONE. 2008; 3(2): e1624                                                         |
| Urotensin 2                                  |                                                                                                       |
| SPANX family, member A1                      |                                                                                                       |
| Sp5 transcription factor                     |                                                                                                       |
| Asialoglycoprotein receptor 1                | Huang Y-CT. Am J Respir Cell Mol Biol. 2009; 41(5): 544                                               |
| Variable charge, X-linked 2                  |                                                                                                       |
| RIKEN cDNA 2310016C16                        |                                                                                                       |
| SH3 domain containing 19                     |                                                                                                       |
| Vasorin                                      | Katayama H. Genome Med. 2009; 1(4): 47<br>Chowdhury UR. Invest Ophthalmol Vis Sci. 2010; 51(10): 4921 |
| Hypothetical protein LOC729085               |                                                                                                       |
| Paired related homeobox 2                    |                                                                                                       |
| Fibrinogen gamma chain                       | 137 articles in MEDLINE                                                                               |
| Fatty acid binding protein 1, liver          | Parent R. Genome Biol. 2008; 9(1): R19<br>Juhl K. Diabetes. 2008; 57(10): 2755                        |
| Transthyretin                                | Gordon S. Curr Cardiovasc Risk Rep. 2010; 4(1): 1                                                     |
| T cell receptor beta variable 5-4            | Ge Y. Blood. 2006 15; 107(4): 1570                                                                    |
| Erythrocyte membrane protein band 4.1-like 1 |                                                                                                       |
| Coagulation factor II (thrombin)             | 366 articles in MEDLINE                                                                               |
| Ninein-like                                  |                                                                                                       |

**Table S3. Predicted associations for TFPI based on co-expression commonalities**

**# Shared Rels:** The number of co-expressed genes (out of 20) that are associated.

**Obs/Exp:** Statistical enrichment ratio between the number of observed commonalities and the number expected by chance alone, given the same number of identically connected genes within a random network of the same size.

**Score:** A priority score to rank the relative importance of the commonalities found.

**Lit Str (Literature strength):** Cumulative tally of the number of times TFPI was mentioned with the term in MEDLINE (0.5 for every abstract co-occurrence, 0.8 per sentence). When **blue**, the GAMMA-predicted association is also a published one, indicating that GAMMA predictions for TFPI widely coincide with known associations.

One out of three predicted associations for TFPI is also common for ADTRP (**Yes**).

| Predicted association                         | # Shared Rels | Obs/Exp | Score | Lit_Str | Is this a predicted association for ADTRP also? |
|-----------------------------------------------|---------------|---------|-------|---------|-------------------------------------------------|
| HEPATOCELLULAR CARCINOMA                      | 12            | 3.81    | 44    | 22.8    | Yes                                             |
| GATA-6                                        | 4             | 11.28   | 44    | 0       |                                                 |
| IL-6                                          | 12            | 3.64    | 42    | 16.2    | Yes                                             |
| BFGF                                          | 9             | 4.83    | 42    | 23.8    |                                                 |
| VEGF                                          | 10            | 4.04    | 40    | 20.2    | Yes                                             |
| Preeclampsia                                  | 7             | 5.7     | 39    | 19.2    | Yes                                             |
| mitogen-activated protein kinase              | 11            | 3.57    | 38    | 8.9     | Yes                                             |
| LDL                                           | 9             | 4.31    | 38    | 88.3    | Yes                                             |
| Proteoglycans                                 | 8             | 4.67    | 35    | 9       |                                                 |
| Factor XIa                                    | 3             | 11.8    | 34    | 5.6     |                                                 |
| factor H                                      | 4             | 8.48    | 33    | 0       |                                                 |
| NF-kappaB                                     | 9             | 3.63    | 31    | 9.8     |                                                 |
| neurogenesis                                  | 6             | 5       | 29    | 0       |                                                 |
| Factor XIIa                                   | 3             | 10.21   | 29    | 5.2     |                                                 |
| C-Reactive Protein                            | 8             | 3.65    | 28    | 41.6    | Yes                                             |
| MMP-9                                         | 7             | 4.16    | 28    | 8.1     |                                                 |
| anticoagulant activity                        | 4             | 7.18    | 28    | 89.6    |                                                 |
| urokinase-type plasminogen activator receptor | 4             | 7.46    | 28    | 3.4     |                                                 |
| HNF1                                          | 4             | 7.16    | 28    | 0       |                                                 |

| Predicted association            | # Shared Rels | Obs/Exp | Score | Lit_Str | Is this a predicted association for ADTRP also? |
|----------------------------------|---------------|---------|-------|---------|-------------------------------------------------|
| erythroid differentiation factor | 3             | 9.93    | 28    | 0       |                                                 |
| phosphorylation                  | 12            | 2.38    | 27    | 13      |                                                 |
| TNF-alpha                        | 11            | 2.54    | 27    | 64.1    |                                                 |
| gene silencing                   | 6             | 4.65    | 27    | 0.5     |                                                 |
| Breast cancer                    | 10            | 2.67    | 26    | 10.7    | Yes                                             |
| fibronectin                      | 8             | 3.42    | 26    | 4.1     | Yes                                             |
| Fibrin                           | 7             | 3.92    | 26    | 126.2   |                                                 |
| AFP                              | 6             | 4.6     | 26    | 0       | Yes                                             |
| antithrombin III                 | 5             | 5.38    | 26    | 117     | Yes                                             |
| heparin binding                  | 5             | 5.32    | 26    | 20.7    |                                                 |
| adiponectin                      | 5             | 5.35    | 26    | 6.6     | Yes                                             |
| alpha 1-Antitrypsin              | 5             | 5.31    | 26    | 1.5     |                                                 |
| cell surface                     | 10            | 2.6     | 25    | 93.4    |                                                 |
| transmembrane                    | 10            | 2.56    | 25    | 7.3     |                                                 |
| PAI-1                            | 6             | 4.41    | 25    | 166.6   |                                                 |
| Apolipoprotein                   | 6             | 4.33    | 25    | 19.4    |                                                 |
| tissue factor                    | 5             | 5.23    | 25    | 1305.7  |                                                 |
| chronic kidney disease           | 5             | 5.25    | 25    | 7.4     |                                                 |
| Cripto-1                         | 3             | 8.84    | 25    | 0       |                                                 |
| JNK                              | 7             | 3.65    | 24    | 8.8     |                                                 |
| plasminogen                      | 6             | 4.23    | 24    | 86.5    |                                                 |
| UROKINASE                        | 6             | 4.18    | 24    | 34.3    |                                                 |
| meningococcal disease            | 3             | 8.19    | 24    | 4.5     | Yes                                             |
| brachyury                        | 3             | 8.08    | 24    | 0       | Yes                                             |
| sepsis                           | 8             | 2.95    | 23    | 121.6   | Yes                                             |
| Angiogenesis                     | 8             | 3.03    | 23    | 24.6    |                                                 |
| Adipocytes                       | 8             | 2.97    | 23    | 2.1     | Yes                                             |
| inflammatory cytokines           | 7             | 3.49    | 23    | 7.9     |                                                 |



| Predicted association    | # Shared Rels | Obs/Exp | Score | Lit_Str | Is this a predicted association for ADTRP also? |
|--------------------------|---------------|---------|-------|---------|-------------------------------------------------|
| Disulfide                | 7             | 3.42    | 23    | 6.8     |                                                 |
| LDL receptor             | 5             | 4.68    | 23    | 3.1     |                                                 |
| Obesity                  | 8             | 2.92    | 22    | 3.4     | Yes                                             |
| leptin                   | 6             | 3.87    | 22    | 2.1     | Yes                                             |
| embryonic stem cells     | 6             | 3.86    | 22    | 0       | Yes                                             |
| cell proliferation       | 10            | 2.22    | 21    | 7.9     | Yes                                             |
| glycosylation            | 7             | 3.09    | 21    | 12.7    | Yes                                             |
| fibrinolysis             | 5             | 4.38    | 21    | 71.9    |                                                 |
| thrombospondin-1         | 4             | 5.43    | 21    | 2.6     | Yes- anti-parallel                              |
| TGF-beta1                | 7             | 3.04    | 20    | 0       | Yes                                             |
| EGFR                     | 7             | 3.15    | 20    | 0       |                                                 |
| Serine protease          | 6             | 3.52    | 20    | 29.7    |                                                 |
| Elastase                 | 5             | 4.09    | 20    | 5.4     |                                                 |
| thrombomodulin           | 4             | 5.26    | 20    | 231.8   |                                                 |
| Myocardial Infarction    | 7             | 2.84    | 19    | 29.1    |                                                 |
| EGF                      | 7             | 2.74    | 19    | 2.6     |                                                 |
| Creatinine               | 7             | 2.89    | 19    | 2.6     |                                                 |
| TGF-BETA                 | 7             | 2.77    | 19    | 1.3     | Yes- anti-parallel                              |
| low-density lipoprotein  | 6             | 3.43    | 19    | 19      | Yes                                             |
| Fibroblast growth factor | 6             | 3.42    | 19    | 3.1     | Yes                                             |
| ANP                      | 5             | 3.92    | 19    | 0       |                                                 |
| cell membrane            | 9             | 2.16    | 18    | 18      |                                                 |
| Immunoglobulin           | 8             | 2.29    | 18    | 6.9     |                                                 |
| Alternative splicing     | 7             | 2.73    | 18    | 20.1    |                                                 |
| protease inhibitors      | 6             | 3.04    | 18    | 55.2    |                                                 |
| chronic renal failure    | 6             | 3.15    | 18    | 12.7    | Yes                                             |
| APOE                     | 5             | 3.82    | 18    | 3.6     |                                                 |
| ovulation                | 5             | 3.79    | 18    | 1.5     |                                                 |

| Predicted association         | # Shared Rels | Obs/Exp | Score | Lit_Str | Is this a predicted association for ADTRP also? |
|-------------------------------|---------------|---------|-------|---------|-------------------------------------------------|
| HGF                           | 5             | 3.7     | 18    | 0       | Yes                                             |
| SHH                           | 4             | 4.81    | 18    | 0       | Yes                                             |
| oxidative stress              | 8             | 2.19    | 17    | 8.1     |                                                 |
| Antioxidant                   | 8             | 2.22    | 17    | 3.1     |                                                 |
| homeostasis                   | 8             | 2.21    | 17    | 2       | Yes                                             |
| IL-1beta                      | 7             | 2.5     | 17    | 15.2    | Yes - anti-parallel                             |
| cell adhesion                 | 7             | 2.64    | 17    | 5.4     | Yes                                             |
| Prostate cancer               | 7             | 2.58    | 17    | 3.9     | Yes                                             |
| Fibrinogen                    | 6             | 2.98    | 17    | 106.9   |                                                 |
| autocrine                     | 6             | 2.93    | 17    | 9.7     | Yes                                             |
| polysaccharide                | 6             | 3.06    | 17    | 9       |                                                 |
| paracrine                     | 6             | 3.05    | 17    | 8.4     |                                                 |
| ERK1                          | 6             | 2.99    | 17    | 7.3     |                                                 |
| heat shock                    | 6             | 3.05    | 17    | 0       |                                                 |
| Protein C                     | 5             | 3.43    | 17    | 228.1   |                                                 |
| clotting                      | 5             | 3.68    | 17    | 132.7   |                                                 |
| Plasminogen activator         | 5             | 3.61    | 17    | 65      |                                                 |
| Angiotensin                   | 5             | 3.55    | 17    | 3.6     |                                                 |
| factor Xa                     | 4             | 4.51    | 17    | 418.6   |                                                 |
| acute phase response          | 4             | 4.34    | 17    | 3.1     | Yes                                             |
| TLR2                          | 4             | 4.44    | 17    | 0       |                                                 |
| signal transduction           | 8             | 2.09    | 16    | 1       |                                                 |
| Thrombin                      | 6             | 2.72    | 16    | 459     |                                                 |
| Autoantibodies                | 6             | 2.83    | 16    | 10.1    |                                                 |
| Nephropathy                   | 5             | 3.45    | 16    | 10.3    |                                                 |
| hypercholesterolemia          | 5             | 3.39    | 16    | 4.4     |                                                 |
| Non-small cell lung carcinoma | 5             | 3.3     | 16    | 0.5     | Yes                                             |
| HBV                           | 5             | 3.32    | 16    | 0       |                                                 |

| Predicted association       | # Shared Rels | Obs/Exp | Score | Lit_Str | Is this a predicted association for ADTRP also? |
|-----------------------------|---------------|---------|-------|---------|-------------------------------------------------|
| serine protease inhibitor   | 4             | 4.2     | 16    | 19.9    |                                                 |
| vitronectin                 | 4             | 4.15    | 16    | 4.9     |                                                 |
| ventricular myocytes        | 4             | 4.32    | 16    | 0       |                                                 |
| Dexamethasone               | 7             | 2.29    | 15    | 0       |                                                 |
| IL-8                        | 6             | 2.69    | 15    | 11.7    |                                                 |
| Trypsin                     | 6             | 2.55    | 15    | 10      |                                                 |
| estrogen receptor           | 6             | 2.72    | 15    | 2.6     | Yes                                             |
| acute myocardial infarction | 5             | 3.23    | 15    | 43.7    |                                                 |
| HDL                         | 5             | 3.15    | 15    | 15.1    | Yes                                             |
| glomeruli                   | 5             | 3.26    | 15    | 8.6     |                                                 |
| bradykinin                  | 5             | 3.18    | 15    | 6.7     |                                                 |
| Osteoarthritis              | 5             | 3.23    | 15    | 2.3     |                                                 |
| PPARgamma                   | 5             | 3.24    | 15    | 0       |                                                 |
| Anticoagulant               | 5             | 2.8     | 15    | 353.7   |                                                 |
| FACTOR IX                   | 4             | 4.06    | 15    | 35.5    | Yes                                             |
| proteinase inhibitors       | 4             | 4.16    | 15    | 25.2    |                                                 |
| haemodialysis               | 4             | 4.03    | 15    | 9.9     |                                                 |

1) 230 aa; Mw ~ 27 kDa

```

      10          20          30          40
MTKTSTCIYH  FLVLSWYTFL  NYYISQEGKD  EVKPKILANG
      50          60          70          80
ARWKYMTLLN - LLLQTIFYGV  TCLDTDLKRT  KGGKDIKFLT
      90          100         110         120
AFRDLLFTTL  AFPVSTFVEL  AFWILFLYNR  DLIYPKVLDT
      130         140         150         160
VIPVWLNHAM  HTFIFPITLA  EVVLRPHSYP  SKKTGLTLLA
      170         180         190         200
AASIAYISRI  LWLYFETGTW  VYPVFAKLSL  LGLAAFFSLS
      210         220         230
YVFIASIYLL  GEKLNHWKWG  DMRQPRKRKRK

```

2) 240 aa; Mw ~ 29 kDa

```

      10          20          30          40
MTKTSTCIYH  FLVLSWYTFL  NYYISQEGKD  EVKPKILANG
      50          60          70          80
ARWKYMTLLN  LLKNRTAGFD  IYQPGSFRQL  LQTIFYGVTC
      90          100         110         120
LDDVLKRTKG  GKDIKFLTAF  RDLLFTTLAE  PVSTFVFLAE
      130         140         150         160
WILFLYNRDL  IYPKVLDTVI  PVWLNHAMHT  FIFPITLAEV
      170         180         190         200
VLRPHSYPSSK  KTGLTLLAAA  SIAYISRILW  LYFETGTWVY
      210         220         230         240
PVFAKLSLLG  LAAFFSLSYV  FIASIYLLGE  KLNHWKWDM
      248
RQPRKRKRK

```

**Figure S1. ADTRP isoforms, predicted sequences and domains.** According to UniProtKB/Swiss-Prot, the protein encoded by *C6orf105* likely has two variants and 3-6 transmembrane domains. Three different predictions for the transmembrane domains are marked on the sequences: highlighted in yellow, underlined in black and over-lined in green. Possible palmitoylation: **C**; phosphorylation: **T**, **S** and **Y**.

## Analysis of LNCaP prostate cancer cells treated with DHT

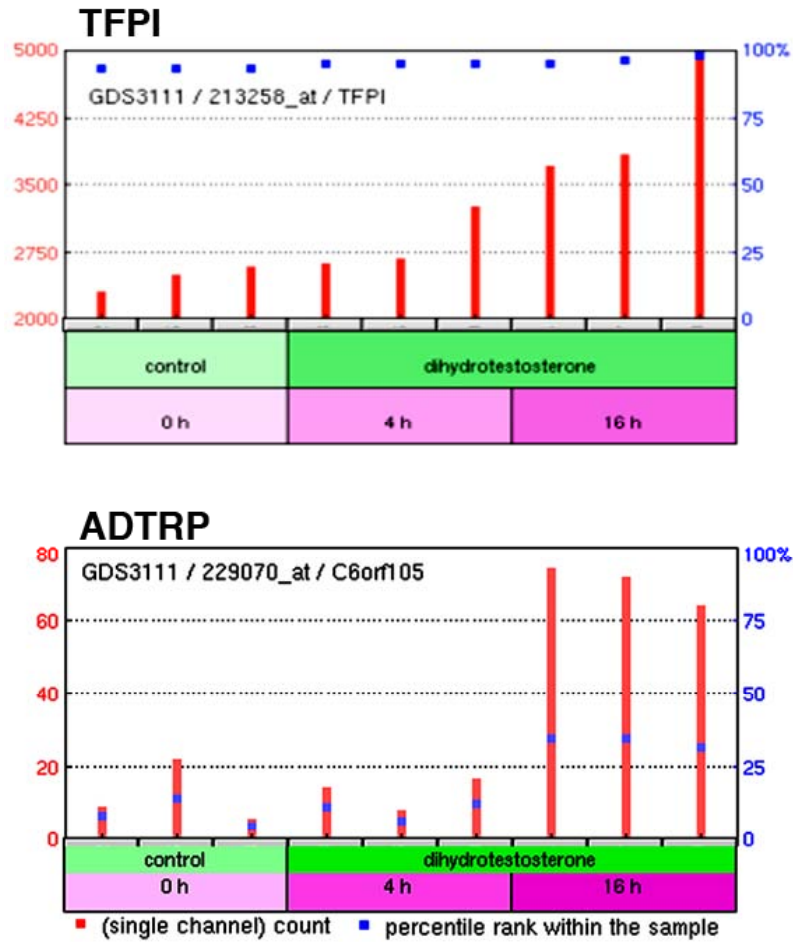

**Figure S2. Androgen effect on ADTRP and TFPI mRNA expression**

Data mining of GEO array profiles revealed significant up-regulation of both ADTRP and TFPI mRNA expression in the LNCaP prostate cancer cell line after androgen incubation.
